# Supplementary material for: Enhanced microwave absorption properties of reduced graphene oxide/TiO2 nanowire composites synthesized via simultaneous carbonation and hydrogenation
Source: Royal Society of Chemistry journal article supplement (doi:10.1039/d2tc01473d), 2022-01-01
Supplement: d2tc01473d1.pdf [file d2tc01473d1.pdf]

## Supporting Information

### **Enhanced microwave absorption properties of reduced graphene oxide/TiO<sub>2</sub> nanowires composites synthesized via simultaneous carbonation and hydrogenation**

*Shuangqiang Shi,<sup>a</sup> Sijia Hao,<sup>ab</sup> Cheng Yang,<sup>\*ab</sup> Yubin Chen,<sup>ab</sup> Hairong Chu<sup>a</sup> and  
Shenglong Dai<sup>a</sup>*

a Research Center of Graphene Applications, Beijing Institute of Aeronautical  
Materials, Beijing, 100095, P. R. China

b Beijing Institute of Graphene Technology, Beijing, 100094, P. R. China

\*Corresponding author: Prof. Cheng Yang, E-mail address: [chengyang\\_78@126.com](mailto:chengyang_78@126.com)

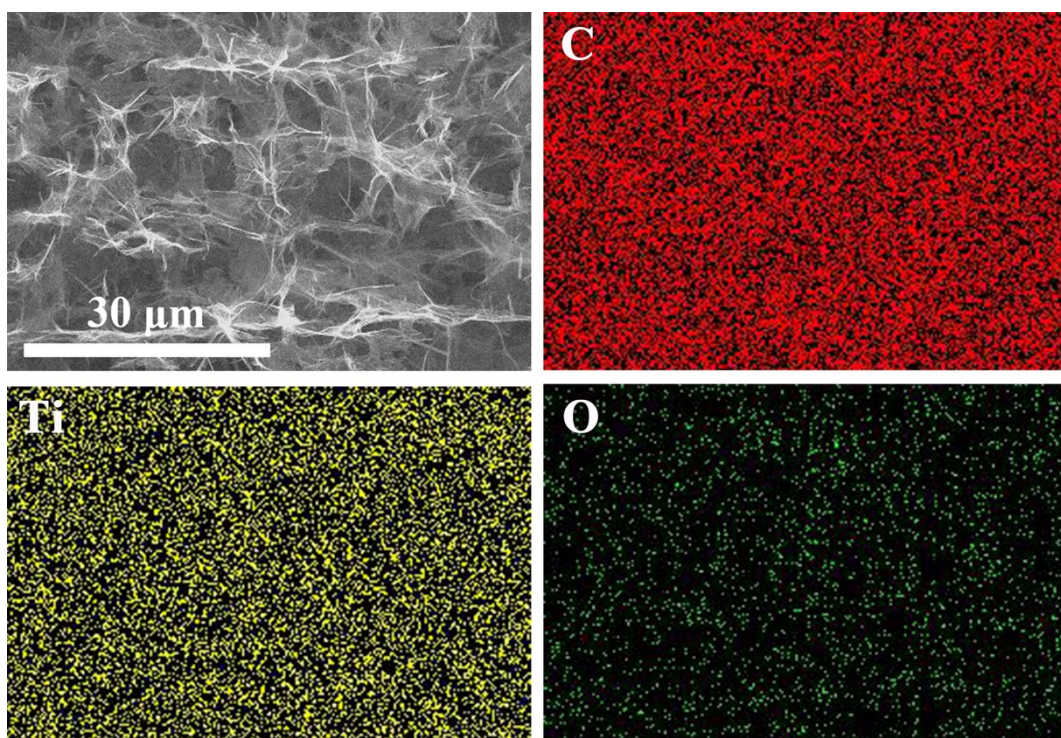

Figure S1. Elemental mappings of GT30.

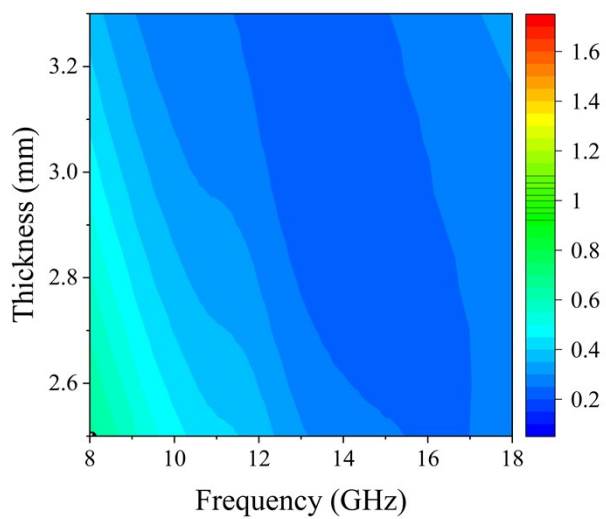

Figure S2. Three-dimensional counter map of  $|Z_{in}/Z_0|$  values with frequency and thickness for RGO.

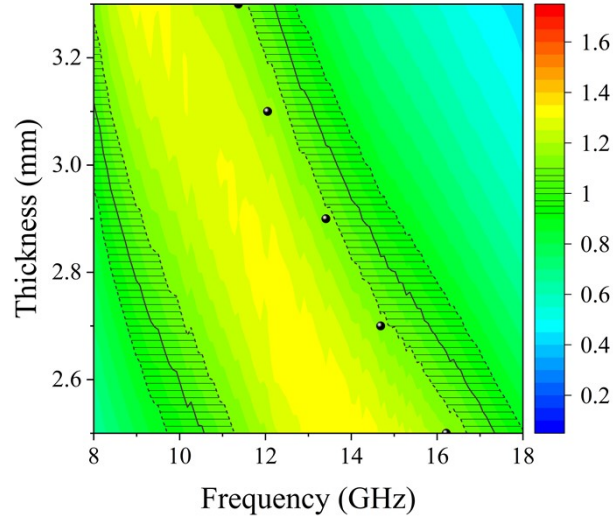

Figure S3. Three-dimensional counter map of  $|Z_{in}/Z_0|$  values with frequency and thickness for GT15.

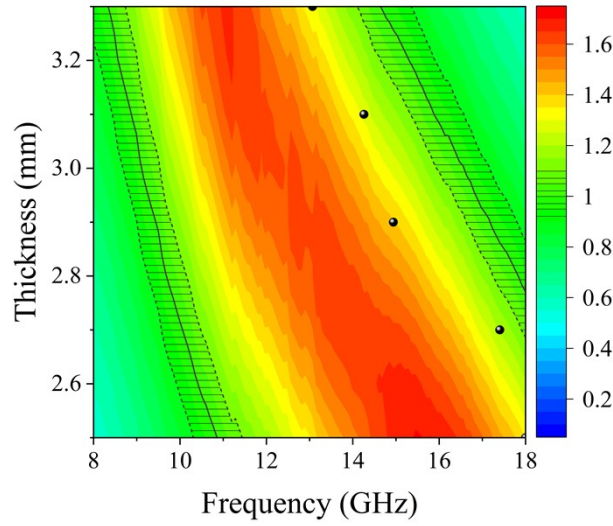

Figure S4. Three-dimensional counter map of  $|Z_{in}/Z_0|$  values with frequency and thickness for GT60.
